# Supplementary material for: Microbiome in Cladonia squamosa Is Vertically Stratified According to Microclimatic Conditions
Source: PubMed Central journal article supplement (PMC7053493; doi:10.3389/fmicb.2020.00268), 2020-02-25
Supplement: Presentation_1.pdf [file Presentation_1.pdf]

**Table S1. Summary of sequencing results**

| Classification                     | Center                  |        |        |        |        |        |        |        |        | Intermediate |        |        |        |        |        |        | Margin |        |        |        |        |        |        |        |        |        |
|------------------------------------|-------------------------|--------|--------|--------|--------|--------|--------|--------|--------|--------------|--------|--------|--------|--------|--------|--------|--------|--------|--------|--------|--------|--------|--------|--------|--------|--------|
|                                    | A                       | B      | C      | D      | E      | F      | G      | H      | I      | A            | B      | C      | D      | E      | F      | G      | A      | B      | C      | D      | E      | F      | G      | H      | I      |        |
| Eukaryotic LSU rDNA sequence reads |                         |        |        |        |        |        |        |        |        |              |        |        |        |        |        |        |        |        |        |        |        |        |        |        |        |        |
| Fungi                              |                         |        |        |        |        |        |        |        |        |              |        |        |        |        |        |        |        |        |        |        |        |        |        |        |        |        |
|                                    | Mycobiont               | 2720   | 1873   | 2465   | 4845   | 5810   | 5478   | 3663   | 3280   | 908          | 1546   | 4228   | 2420   | 3532   | 2384   | 4459   | 3266   | 6534   | 1474   | 1823   | 1457   | 780    | 1147   | 2967   | 3474   | 1611   |
|                                    |                         | (94.4) | (92.1) | (95.2) | (93.3) | (94.1) | (92.3) | (92.3) | (95)   | (82.1)       | (91.5) | (88.1) | (80.9) | (87.5) | (88.4) | (87.8) | (92.8) | (92.1) | (81.5) | (83.1) | (71.9) | (52.3) | (63.8) | (82.4) | (87)   | (86.1) |
|                                    | Lichen associated fungi | 55     | 52     | 56     | 133    | 132    | 314    | 200    | 116    | 39           | 43     | 273    | 396    | 262    | 158    | 445    | 131    | 206    | 187    | 210    | 275    | 493    | 467    | 491    | 311    | 126    |
|                                    |                         | (1.9)  | (2.5)  | (2.2)  | (2.6)  | (2.1)  | (5.3)  | (5)    | (3.4)  | (3.5)        | (2.5)  | (5.7)  | (13.2) | (6.5)  | (5.9)  | (8.8)  | (3.7)  | (2.9)  | (10.3) | (9.6)  | (13.6) | (33)   | (26)   | (13.6) | (7.8)  | (6.7)  |
| Algae                              |                         |        |        |        |        |        |        |        |        |              |        |        |        |        |        |        |        |        |        |        |        |        |        |        |        |        |
|                                    | Major photobiont        | 94     | 106    | 59     | 185    | 186    | 77     | 7      | 7      | 0            | 88     | 241    | 135    | 187    | 89     | 87     | 26     | 273    | 109    | 50     | 126    | 41     | 46     | 23     | 19     | 7      |
|                                    |                         | (3.3)  | (5.2)  | (2.3)  | (3.6)  | (3)    | (1.3)  | (0.2)  | (0.2)  | (0)          | (5.2)  | (5)    | (4.5)  | (4.6)  | (3.3)  | (1.7)  | (0.7)  | (3.8)  | (6)    | (2.3)  | (6.2)  | (2.7)  | (2.6)  | (0.6)  | (0.5)  | (0.4)  |
|                                    | Minor photobiont        | 7      | 3      | 6      | 17     | 31     | 19     | 68     | 22     | 2            | 11     | 50     | 38     | 42     | 46     | 77     | 68     | 77     | 37     | 106    | 159    | 167    | 93     | 70     | 74     | 60     |
|                                    |                         | (0.2)  | (0.1)  | (0.2)  | (0.3)  | (0.5)  | (0.3)  | (1.7)  | (0.6)  | (0.2)        | (0.7)  | (1)    | (1.3)  | (1)    | (1.7)  | (1.5)  | (1.9)  | (1.1)  | (2)    | (4.8)  | (7.8)  | (11.2) | (5.2)  | (1.9)  | (1.9)  | (3.2)  |
|                                    | others                  | 0      | 0      | 0      | 0      | 2      | 0      | 0      | 0      | 0            | 0      | 0      | 0      | 0      | 0      | 2      | 1      | 0      | 0      | 0      | 1      | 2      | 0      | 0      | 1      | 0      |
|                                    |                         | (0)    | (0)    | (0)    | (0)    | (0)    | (0)    | (0)    | (0)    | (0)          | (0)    | (0)    | (0)    | (0)    | (0)    | (0)    | (0)    | (0)    | (0)    | (0)    | (0)    | (0.1)  | (0)    | (0)    | (0)    | (0)    |
|                                    | Animal                  | 2      | 0      | 2      | 10     | 7      | 38     | 21     | 23     | 155          | 1      | 4      | 1      | 7      | 11     | 1      | 13     | 3      | 1      | 3      | 2      | 7      | 28     | 20     | 76     | 42     |
|                                    |                         | (0.1)  | (0)    | (0.1)  | (0.2)  | (0.1)  | (0.6)  | (0.5)  | (0.7)  | (14)         | (0.1)  | (0.1)  | (0)    | (0.2)  | (0.4)  | (0)    | (0.4)  | (0)    | (0.1)  | (0.1)  | (0.1)  | (0.5)  | (1.6)  | (0.6)  | (1.9)  | (2.2)  |
|                                    | Protozoa                | 2      | 0      | 0      | 0      | 3      | 0      | 1      | 4      | 1            | 0      | 0      | 1      | 4      | 3      | 2      | 4      | 0      | 1      | 2      | 5      | 2      | 15     | 27     | 35     | 21     |
|                                    |                         | (0.1)  | (0)    | (0)    | (0)    | (0)    | (0)    | (0)    | (0.1)  | (0.1)        | (0)    | (0)    | (0)    | (0.1)  | (0.1)  | (0)    | (0.1)  | (0)    | (0.1)  | (0.1)  | (0.2)  | (0.1)  | (0.8)  | (0.7)  | (0.9)  | (1.1)  |
|                                    | Unclassified            | 0      | 0      | 0      | 2      | 2      | 11     | 10     | 2      | 1            | 0      | 2      | 2      | 1      | 5      | 8      | 12     | 1      | 0      | 0      | 2      | 0      | 2      | 3      | 4      | 3      |
|                                    |                         | (0)    | (0)    | (0)    | (0)    | (0)    | (0.2)  | (0.3)  | (0.1)  | (0.1)        | (0)    | (0)    | (0.1)  | (0)    | (0.2)  | (0.2)  | (0.3)  | (0)    | (0)    | (0)    | (0.1)  | (0)    | (0.1)  | (0.1)  | (0.1)  | (0.2)  |
|                                    | Total reads             | 2880   | 2034   | 2588   | 5192   | 6173   | 5937   | 3970   | 3454   | 1106         | 1689   | 4798   | 2993   | 4035   | 2696   | 5081   | 3521   | 7094   | 1809   | 2194   | 2027   | 1492   | 1798   | 3601   | 3994   | 1870   |
| Bacterial 16S rDNA sequence reads  |                         |        |        |        |        |        |        |        |        |              |        |        |        |        |        |        |        |        |        |        |        |        |        |        |        |        |
|                                    | Bacteria                | 2787   | 2456   | 2249   | 2278   | 2775   | 1902   | 3778   | 1483   | 1452         | 1557   | 845    | 1842   | 1493   | 2612   | 1934   | 2634   | 1343   | 748    | 685    | 2544   | 3064   | 3497   | 1228   | 3883   | 1334   |
|                                    |                         | (55.7) | (63)   | (74.4) | (76.4) | (77.1) | (89)   | (95.9) | (81.6) | (77.6)       | (53.3) | (74.3) | (70.1) | (72.6) | (80.3) | (80.6) | (92.3) | (58.7) | (65.4) | (59.2) | (67.8) | (86.9) | (94.5) | (77.6) | (97.3) | (92.9) |
|                                    | Archaea                 | 0      | 0      | 0      | 0      | 0      | 0      | 0      | 0      | 1            | 0      | 0      | 0      | 0      | 0      | 0      | 0      | 0      | 0      | 0      | 0      | 0      | 0      | 0      | 0      | 0      |
|                                    |                         | (0)    | (0)    | (0)    | (0)    | (0)    | (0)    | (0)    | (0)    | (0.1)        | (0)    | (0)    | (0)    | (0)    | (0)    | (0)    | (0)    | (0)    | (0)    | (0)    | (0)    | (0)    | (0)    | (0)    | (0)    | (0)    |
|                                    | Plastid                 | 2105   | 1393   | 588    | 419    | 667    | 69     | 37     | 10     | 3            | 1275   | 229    | 571    | 469    | 257    | 129    | 52     | 901    | 357    | 422    | 1177   | 408    | 169    | 13     | 44     | 6      |
|                                    |                         | (42.1) | (35.7) | (19.5) | (14)   | (18.5) | (3.2)  | (0.9)  | (0.5)  | (0.2)        | (43.7) | (20.1) | (21.7) | (22.8) | (7.9)  | (5.4)  | (1.8)  | (39.4) | (31.2) | (36.5) | (31.4) | (11.6) | (4.6)  | (0.8)  | (1.1)  | (0.4)  |
|                                    | Unclassified            | 111    | 51     | 185    | 286    | 155    | 167    | 125    | 325    | 416          | 88     | 64     | 214    | 93     | 382    | 338    | 167    | 44     | 39     | 50     | 29     | 54     | 33     | 342    | 63     | 95     |
|                                    |                         | (2.2)  | (1.3)  | (6.1)  | (9.6)  | (4.3)  | (7.8)  | (3.2)  | (17.9) | (22.2)       | (3)    | (5.6)  | (8.1)  | (4.5)  | (11.8) | (14.1) | (5.9)  | (1.9)  | (3.4)  | (4.3)  | (0.8)  | (1.5)  | (0.9)  | (21.6) | (1.6)  | (6.6)  |
|                                    | Total reads             | 5002   | 3900   | 3022   | 2983   | 3597   | 2138   | 3940   | 1818   | 1872         | 2920   | 1137   | 2628   | 2055   | 3251   | 2400   | 2853   | 2287   | 1144   | 1157   | 3750   | 3526   | 3699   | 1583   | 3990   | 1435   |

**Table S2. Relative abundance of major algal OTUs along the thalli**

| OTU_ID      | Class            | Close relative                  | Similarity (%) | Center |      |      |      |      |      |      |      |      | Intermediate |      |      |      |      |      | Margin |      |      |      |      |      |      |      |      |      |
|-------------|------------------|---------------------------------|----------------|--------|------|------|------|------|------|------|------|------|--------------|------|------|------|------|------|--------|------|------|------|------|------|------|------|------|------|
|             |                  |                                 |                | A      | B    | C    | D    | E    | F    | G    | H    | I    | A            | B    | C    | D    | E    | F    | G      | A    | B    | C    | D    | E    | F    | G    | H    | I    |
| EukCL3      | Trebouxiophyceae | <i>Asterochrolis erici</i>      | 98.8           | 93.1   | 97.2 | 90.8 | 91.6 | 85.7 | 80.1 | 9.3  | 24.1 | 0.0  | 88.9         | 82.8 | 78.0 | 81.7 | 65.9 | 53.0 | 27.7   | 78.0 | 74.7 | 32.1 | 44.2 | 19.7 | 33.0 | 24.7 | 20.4 | 10.4 |
| EukCL35     | Trebouxiophyceae | <i>Trebouxia jamesii</i>        | 99.3           | 1.0    | 0.9  | 0.0  | 1.0  | 0.5  | 3.1  | 17.3 | 0.0  | 0.0  | 0.0          | 1.0  | 4.6  | 1.3  | 0.0  | 0.0  | 0.0    | 0.3  | 2.1  | 2.6  | 1.4  | 1.4  | 1.4  | 0.0  | 1.1  | 1.5  |
| EukCL9      | Trebouxiophyceae | <i>Trebouxia impressa</i>       | 98.3           | 2.0    | 0.0  | 0.0  | 1.0  | 0.0  | 0.0  | 0.0  | 0.0  | 0.0  | 5.1          | 0.3  | 0.6  | 0.0  | 0.0  | 0.0  | 0.0    | 0.0  | 0.0  | 0.0  | 0.0  | 0.0  | 0.0  | 0.0  | 0.0  | 0.0  |
| EukCL70     | Trebouxiophyceae | <i>Trebouxia asymmetrica</i>    | 98.1           | 0.0    | 0.0  | 0.0  | 0.0  | 0.0  | 0.0  | 57.2 | 0.0  | 0.0  | 0.0          | 0.0  | 0.0  | 0.0  | 0.0  | 0.0  | 0.0    | 0.0  | 0.0  | 0.0  | 4.3  | 3.6  | 1.1  | 0.0  | 0.0  |      |
| EukCL14     | Trebouxiophyceae | <i>Koliella longiseta</i>       | 85.5           | 1.0    | 0.0  | 1.5  | 3.0  | 6.5  | 9.4  | 6.7  | 37.9 | 50.0 | 0.0          | 0.3  | 2.9  | 6.1  | 26.7 | 39.6 | 60.6   | 1.4  | 4.1  | 15.4 | 38.9 | 63.0 | 51.8 | 34.4 | 10.8 | 19.4 |
| EukCL32     | Trebouxiophyceae | <i>Coccomyxa chodatii</i>       | 92             | 0.0    | 0.0  | 3.1  | 0.5  | 0.5  | 1.0  | 1.3  | 6.9  | 0.0  | 2.0          | 4.1  | 5.2  | 1.7  | 3.0  | 0.0  | 0.0    | 10.0 | 6.8  | 22.4 | 3.5  | 1.9  | 0.0  | 3.2  | 0.0  | 0.0  |
| EukCL50     | Trebouxiophyceae | <i>Coccomyxa subellipsoidea</i> | 87.5           | 0.0    | 0.0  | 1.5  | 0.0  | 0.9  | 1.0  | 0.0  | 3.4  | 50.0 | 0.0          | 0.3  | 0.0  | 0.0  | 0.7  | 0.6  | 1.1    | 0.6  | 0.7  | 1.9  | 1.1  | 0.5  | 1.4  | 4.3  | 3.2  | 3.0  |
| EukCL56     | Trebouxiophyceae | <i>Coccomyxa chodatii</i>       | 91.7           | 3.0    | 0.0  | 0.0  | 0.5  | 0.9  | 0.0  | 0.0  | 0.0  | 0.0  | 3.0          | 2.7  | 1.2  | 1.3  | 0.7  | 0.0  | 0.0    | 5.1  | 3.4  | 4.5  | 1.4  | 0.0  | 0.0  | 0.0  | 0.0  | 0.0  |
| EukCL24     | Trebouxiophyceae | <i>Leptosira terrestris</i>     | 94.4           | 0.0    | 0.9  | 1.5  | 1.0  | 1.8  | 0.0  | 0.0  | 0.0  | 0.0  | 1.0          | 6.9  | 6.4  | 3.1  | 1.5  | 0.6  | 0.0    | 4.0  | 3.4  | 14.7 | 2.8  | 1.4  | 2.2  | 0.0  | 3.2  | 0.0  |
| EukCL46     | Ulvophyceae      | <i>Trentepohlia cf. arborum</i> | 93             | 0.0    | 0.0  | 0.0  | 0.0  | 0.9  | 0.0  | 0.0  | 3.4  | 0.0  | 0.0          | 0.0  | 0.0  | 0.0  | 0.0  | 2.1  | 0.0    | 0.7  | 0.6  | 0.7  | 0.5  | 2.2  | 1.1  | 51.6 | 56.7 |      |
| Minor algae |                  |                                 |                | 0.0    | 0.9  | 1.5  | 1.5  | 2.3  | 5.3  | 8.1  | 24.1 | 0.0  | 0.0          | 1.4  | 1.2  | 4.8  | 1.5  | 6.1  | 8.5    | 0.6  | 4.1  | 5.8  | 6.0  | 7.2  | 4.4  | 31.2 | 9.7  | 9.0  |

Major OTUs with higher than 0.5% relative abundance were treated separately and the other OTUs were merged as minor algae. Relative abundance was shaded with gradual dense from red to white.

**Table S3. Relative abundance of lichen-associated fungi at the class level along the thalli**

| Phylum          | Class               | Center |      |      |      |      |      |      |      |      | Intermediate |      |      |      |      |      |      | Margin |      |      |      |      |      |      |      |      |
|-----------------|---------------------|--------|------|------|------|------|------|------|------|------|--------------|------|------|------|------|------|------|--------|------|------|------|------|------|------|------|------|
|                 |                     | A      | B    | C    | D    | E    | F    | G    | H    | I    | A            | B    | C    | D    | E    | F    | G    | A      | B    | C    | D    | E    | F    | G    | H    | I    |
| Ascomycota      | Arthoniomycetes     | 10.9   | 19.2 | 7.1  | 18.1 | 13.6 | 1.3  | 0.5  | 0.0  | 0.0  | 27.9         | 52.8 | 37.9 | 36.6 | 8.2  | 0.5  | 0.0  | 7.7    | 5.4  | 3.3  | 0.0  | 0.0  | 0.9  | 0.2  | 0.0  | 0.0  |
| Ascomycota      | Dothideomycetes     | 0.0    | 0.0  | 5.4  | 1.5  | 3.8  | 1.3  | 0.5  | 2.6  | 0.0  | 0.0          | 1.8  | 1.8  | 1.9  | 3.2  | 0.9  | 1.5  | 1.5    | 1.1  | 2.4  | 1.8  | 0.8  | 1.3  | 1.0  | 2.9  | 6.4  |
| Ascomycota      | Eurotiomycetes      | 0.0    | 0.0  | 1.8  | 3.0  | 3.0  | 11.2 | 2.5  | 8.6  | 18.0 | 2.3          | 2.2  | 0.5  | 0.0  | 0.6  | 0.5  | 3.1  | 0.0    | 1.1  | 0.5  | 1.5  | 3.7  | 13.5 | 23.8 | 36.3 | 31.0 |
| Ascomycota      | Lecanoromycetes     | 78.2   | 78.9 | 73.2 | 60.2 | 50.8 | 54.5 | 71.4 | 27.6 | 28.2 | 44.2         | 22.0 | 51.5 | 30.5 | 43.0 | 60.9 | 55.7 | 74.9   | 85.6 | 86.7 | 94.2 | 89.8 | 59.9 | 27.3 | 41.5 | 26.2 |
| Ascomycota      | Leotiomycetes       | 3.6    | 0.0  | 5.4  | 12.8 | 20.5 | 25.5 | 21.1 | 49.1 | 51.3 | 9.3          | 7.7  | 3.8  | 17.9 | 38.0 | 13.9 | 32.8 | 3.4    | 0.5  | 2.9  | 2.2  | 5.5  | 23.0 | 46.0 | 16.4 | 33.3 |
| Ascomycota      | Saccharomycetes     | 0.0    | 0.0  | 0.0  | 0.0  | 0.0  | 0.0  | 0.0  | 0.0  | 0.0  | 0.0          | 0.0  | 0.0  | 0.0  | 0.0  | 0.0  | 0.0  | 0.0    | 0.0  | 0.0  | 0.0  | 0.0  | 0.0  | 0.2  | 0.0  | 0.0  |
| Ascomycota      | Sordariomycetes     | 0.0    | 0.0  | 0.0  | 0.0  | 0.8  | 0.6  | 0.0  | 0.9  | 0.0  | 0.0          | 0.0  | 0.3  | 0.0  | 0.6  | 19.6 | 0.0  | 0.0    | 0.0  | 0.0  | 0.0  | 0.0  | 0.6  | 0.0  | 0.0  | 0.0  |
| Ascomycota      | Others              | 0.0    | 0.0  | 1.8  | 0.0  | 0.0  | 0.0  | 0.0  | 0.0  | 0.0  | 0.0          | 0.0  | 0.3  | 0.0  | 0.0  | 0.0  | 0.0  | 0.5    | 0.0  | 0.0  | 0.0  | 0.0  | 0.0  | 0.0  | 1.9  | 0.0  |
| Basidiomycota   | Agaricomycetes      | 0.0    | 0.0  | 0.0  | 0.0  | 0.0  | 0.0  | 0.0  | 0.0  | 0.0  | 0.0          | 0.0  | 0.0  | 0.4  | 0.6  | 0.2  | 0.0  | 0.0    | 0.0  | 0.5  | 0.0  | 0.0  | 0.0  | 0.0  | 0.3  | 0.0  |
| Basidiomycota   | Cystobasidiomycetes | 3.6    | 1.9  | 1.8  | 0.8  | 3.0  | 1.9  | 1.0  | 0.0  | 0.0  | 14.0         | 12.8 | 3.5  | 10.3 | 4.4  | 1.8  | 0.8  | 11.1   | 3.2  | 3.8  | 0.4  | 0.0  | 0.2  | 0.2  | 0.0  | 0.0  |
| Basidiomycota   | Tremellomycetes     | 1.8    | 0.0  | 1.8  | 3.0  | 1.5  | 2.6  | 1.0  | 4.3  | 2.6  | 2.3          | 0.4  | 0.3  | 1.5  | 1.3  | 0.2  | 5.3  | 0.5    | 0.0  | 0.0  | 0.0  | 0.0  | 0.2  | 0.2  | 0.3  | 1.6  |
| Basidiomycota   | Others              | 1.8    | 0.0  | 1.8  | 0.0  | 2.3  | 0.6  | 1.0  | 2.6  | 0.0  | 0.0          | 0.4  | 0.3  | 0.8  | 0.0  | 0.9  | 0.0  | 0.0    | 0.0  | 0.0  | 0.0  | 0.0  | 0.2  | 0.4  | 0.0  | 0.0  |
| Chytridiomycota | Chytridiomycetes    | 0.0    | 0.0  | 0.0  | 0.0  | 0.0  | 0.0  | 0.0  | 0.0  | 0.0  | 0.0          | 0.0  | 0.0  | 0.0  | 0.0  | 0.0  | 0.0  | 0.0    | 0.0  | 0.0  | 0.0  | 0.0  | 0.0  | 0.0  | 0.0  | 0.8  |
| Unclassified    | Unclassified        | 0.0    | 0.0  | 0.0  | 0.8  | 0.8  | 0.6  | 1.0  | 4.3  | 0.0  | 0.0          | 0.0  | 0.0  | 0.0  | 0.0  | 0.7  | 0.8  | 0.5    | 3.2  | 0.0  | 0.0  | 0.2  | 0.2  | 0.6  | 0.3  | 0.8  |

Relative abundance was shaded with gradual dense from red to white.

**Table S4. Relative abundance of major lichen-associated fungal OTUs along the thalli**

| Phylum        | Class               | OTU_ID     | Center |      |      |      |      |      |      |      |      | Intermediate |      |      |      |      |      |      | Margin |      |      |      |      |      |      |      |      |
|---------------|---------------------|------------|--------|------|------|------|------|------|------|------|------|--------------|------|------|------|------|------|------|--------|------|------|------|------|------|------|------|------|
|               |                     |            | A      | B    | C    | D    | E    | F    | G    | H    | I    | A            | B    | C    | D    | E    | F    | G    | A      | B    | C    | D    | E    | F    | G    | H    | I    |
| Ascomycota    | Arthoniomycetes     | EukCL4     | 10.9   | 19.3 | 7.1  | 18.0 | 13.6 | 1.3  | 0.5  | 0.0  | 0.0  | 25.6         | 52.7 | 37.6 | 36.6 | 8.2  | 0.4  | 0.0  | 7.8    | 5.4  | 3.3  | 0.0  | 0.0  | 0.0  | 0.2  | 0.0  | 0.0  |
| Ascomycota    | Dothideomycetes     | EukCL59    | 0.0    | 0.0  | 3.6  | 0.0  | 2.3  | 0.0  | 0.0  | 0.9  | 0.0  | 0.0          | 0.0  | 0.8  | 0.8  | 0.6  | 0.4  | 0.0  | 0.5    | 0.0  | 1.4  | 1.8  | 0.2  | 1.3  | 1.0  | 1.0  | 1.6  |
| Ascomycota    | Dothideomycetes     | EukCL71    | 0.0    | 0.0  | 1.8  | 0.0  | 0.8  | 1.0  | 0.5  | 0.9  | 0.0  | 0.0          | 1.1  | 0.5  | 0.4  | 1.9  | 0.4  | 0.8  | 1.0    | 1.1  | 0.5  | 0.0  | 0.6  | 0.0  | 0.0  | 0.0  | 4.0  |
| Ascomycota    | Eurotiomycetes      | EukCL13    | 0.0    | 0.0  | 0.0  | 1.5  | 0.0  | 1.6  | 1.0  | 6.0  | 15.4 | 0.0          | 2.2  | 0.0  | 0.0  | 0.0  | 0.0  | 0.8  | 0.0    | 1.1  | 0.5  | 0.0  | 1.6  | 11.1 | 19.8 | 32.2 | 7.9  |
| Ascomycota    | Eurotiomycetes      | EukCL21    | 0.0    | 0.0  | 0.0  | 0.0  | 0.0  | 7.6  | 0.0  | 0.0  | 2.6  | 0.0          | 0.0  | 0.0  | 0.0  | 0.0  | 0.0  | 0.0  | 0.0    | 0.0  | 0.0  | 0.4  | 0.2  | 1.3  | 2.6  | 1.6  | 12.7 |
| Ascomycota    | Eurotiomycetes      | EukCL34    | 0.0    | 0.0  | 0.0  | 0.0  | 2.3  | 0.6  | 0.0  | 0.0  | 0.0  | 0.0          | 0.0  | 0.0  | 0.0  | 0.6  | 0.4  | 0.8  | 0.0    | 0.0  | 0.0  | 0.7  | 0.0  | 0.0  | 0.0  | 1.6  | 0.8  |
| Ascomycota    | Eurotiomycetes      | EukCL49    | 0.0    | 0.0  | 0.0  | 0.0  | 0.0  | 0.0  | 0.5  | 2.6  | 0.0  | 0.0          | 0.0  | 0.0  | 0.0  | 0.0  | 0.0  | 0.0  | 0.0    | 0.0  | 0.0  | 0.0  | 0.2  | 0.2  | 0.2  | 1.0  | 5.6  |
| Ascomycota    | Eurotiomycetes      | EukCL33    | 0.0    | 0.0  | 0.0  | 0.0  | 0.0  | 0.3  | 0.0  | 0.0  | 0.0  | 0.0          | 0.0  | 0.0  | 0.0  | 0.0  | 0.0  | 0.0  | 0.0    | 0.0  | 0.0  | 0.0  | 0.0  | 0.0  | 0.0  | 0.0  | 0.0  |
| Ascomycota    | Lecanoromycetes     | EukCL2     | 0.0    | 11.6 | 1.8  | 0.0  | 9.8  | 16.9 | 0.5  | 1.7  | 0.0  | 0.0          | 2.2  | 0.3  | 0.0  | 0.0  | 0.2  | 0.0  | 0.0    | 0.0  | 0.0  | 0.4  | 0.0  | 0.0  | 0.0  | 2.3  | 0.0  |
| Ascomycota    | Lecanoromycetes     | EukCL7     | 0.0    | 5.8  | 33.9 | 1.5  | 0.0  | 9.9  | 0.0  | 0.0  | 0.0  | 0.0          | 0.0  | 1.0  | 3.1  | 1.9  | 47.4 | 38.4 | 43.4   | 49.9 | 48.6 | 63.9 | 44.4 | 47.7 | 22.0 | 30.2 | 8.7  |
| Ascomycota    | Lecanoromycetes     | EukCL10    | 30.9   | 9.7  | 0.0  | 0.0  | 0.0  | 6.0  | 51.6 | 0.0  | 0.0  | 0.0          | 0.0  | 0.0  | 2.7  | 16.5 | 0.7  | 0.0  | 0.0    | 5.4  | 20.5 | 15.3 | 28.6 | 6.6  | 0.0  | 0.0  | 0.0  |
| Ascomycota    | Lecanoromycetes     | EukCL16    | 0.0    | 0.0  | 0.0  | 5.3  | 0.0  | 0.0  | 0.0  | 0.0  | 0.0  | 0.0          | 0.4  | 0.3  | 4.6  | 4.4  | 0.9  | 0.8  | 0.0    | 0.0  | 0.5  | 1.5  | 0.0  | 0.0  | 0.0  | 0.0  | 0.0  |
| Ascomycota    | Lecanoromycetes     | EukCL17    | 1.8    | 1.9  | 1.8  | 8.3  | 5.3  | 1.9  | 0.0  | 0.0  | 0.0  | 0.0          | 3.3  | 0.3  | 0.4  | 1.3  | 0.0  | 0.0  | 0.5    | 0.5  | 0.0  | 0.4  | 0.0  | 0.0  | 0.0  | 0.0  | 2.4  |
| Ascomycota    | Lecanoromycetes     | EukCL42    | 0.0    | 0.0  | 0.0  | 0.0  | 0.0  | 0.0  | 0.0  | 0.0  | 0.0  | 0.0          | 0.0  | 40.7 | 0.4  | 0.0  | 0.0  | 0.0  | 0.0    | 0.0  | 0.0  | 0.0  | 0.0  | 0.0  | 0.0  | 0.0  | 0.0  |
| Ascomycota    | Lecanoromycetes     | EukCL47    | 0.0    | 1.9  | 1.8  | 0.0  | 0.0  | 0.0  | 1.6  | 0.0  | 0.0  | 0.0          | 0.0  | 0.0  | 0.4  | 1.3  | 0.4  | 0.0  | 0.0    | 0.0  | 0.0  | 0.4  | 0.4  | 0.2  | 0.0  | 0.3  | 0.8  |
| Ascomycota    | Leotiomycetes       | EukCL6     | 0.0    | 0.0  | 0.0  | 0.0  | 0.0  | 1.6  | 3.0  | 8.6  | 0.0  | 0.0          | 0.4  | 0.0  | 0.4  | 0.0  | 0.2  | 0.0  | 0.0    | 0.0  | 0.0  | 0.0  | 0.0  | 2.8  | 5.3  | 1.6  | 10.3 |
| Ascomycota    | Leotiomycetes       | EukCL11    | 0.0    | 0.0  | 1.8  | 3.8  | 9.1  | 11.5 | 5.5  | 19.8 | 15.4 | 0.0          | 0.4  | 0.3  | 2.3  | 8.2  | 3.6  | 19.1 | 1.0    | 0.0  | 0.5  | 0.7  | 4.1  | 14.8 | 18.5 | 5.5  | 8.7  |
| Ascomycota    | Leotiomycetes       | EukCL12    | 0.0    | 0.0  | 0.0  | 2.3  | 2.3  | 1.3  | 0.0  | 6.0  | 17.9 | 4.7          | 0.4  | 0.3  | 0.4  | 1.9  | 0.2  | 0.0  | 0.5    | 0.0  | 0.5  | 0.0  | 0.0  | 0.2  | 0.6  | 0.6  | 1.6  |
| Ascomycota    | Leotiomycetes       | EukCL15    | 1.8    | 0.0  | 0.0  | 0.0  | 0.0  | 0.3  | 0.0  | 2.6  | 2.6  | 0.0          | 0.0  | 0.0  | 0.0  | 0.0  | 0.0  | 0.0  | 0.0    | 0.0  | 0.0  | 0.0  | 0.0  | 3.0  | 13.0 | 0.3  | 0.8  |
| Ascomycota    | Leotiomycetes       | EukCL22    | 0.0    | 0.0  | 1.8  | 0.0  | 0.0  | 3.2  | 2.0  | 0.0  | 0.0  | 4.7          | 5.5  | 3.0  | 13.0 | 24.7 | 7.6  | 5.3  | 0.5    | 0.0  | 0.5  | 0.4  | 0.0  | 0.0  | 0.0  | 0.0  | 0.0  |
| Ascomycota    | Leotiomycetes       | EukCL31    | 0.0    | 0.0  | 0.0  | 2.3  | 4.5  | 3.8  | 7.0  | 2.6  | 2.6  | 0.0          | 0.7  | 0.0  | 0.4  | 2.5  | 0.7  | 2.3  | 0.0    | 0.0  | 0.0  | 0.7  | 0.6  | 1.3  | 5.3  | 4.8  | 6.3  |
| Basidiomycota | Cystobasidiomycetes | EukCL23    | 3.6    | 1.9  | 1.8  | 0.8  | 2.3  | 1.6  | 1.0  | 0.0  | 0.0  | 4.7          | 8.8  | 3.0  | 8.8  | 3.8  | 1.6  | 0.8  | 11.2   | 3.2  | 3.8  | 0.4  | 0.0  | 0.2  | 0.2  | 0.0  | 0.0  |
|               |                     | Minor OTUs | 50.9   | 47.9 | 42.9 | 56.4 | 47.7 | 29.6 | 25.3 | 48.3 | 43.6 | 60.5         | 22.0 | 12.1 | 25.6 | 22.2 | 34.6 | 31.1 | 33.8   | 33.4 | 19.5 | 13.2 | 19.0 | 9.3  | 11.2 | 17.0 | 27.8 |

Major OTUs with higher than 0.5% relative abundance in lichen-associated fungal sequences were treated separately. Relative abundance was shaded with gradual dense from red to white.

**Table S5. Relative abundance of bacterial classes along the thalli**

| Phylum                   | Class                       | Center |      |      |      |      |      |      |      |      | Intermediate |      |      |      |      |      |      | Margin |      |      |      |      |      |      |      |      |
|--------------------------|-----------------------------|--------|------|------|------|------|------|------|------|------|--------------|------|------|------|------|------|------|--------|------|------|------|------|------|------|------|------|
|                          |                             | A      | B    | C    | D    | E    | F    | G    | H    | I    | A            | B    | C    | D    | E    | F    | G    | A      | B    | C    | D    | E    | F    | G    | H    | I    |
| <i>Acidobacteria</i>     | <i>Acidobacteria_Gp1</i>    | 25.1   | 21.4 | 17.0 | 17.3 | 18.0 | 22.5 | 26.6 | 18.3 | 21.3 | 29.0         | 15.4 | 16.2 | 13.3 | 18.1 | 18.8 | 23.7 | 23.3   | 18.3 | 18.4 | 15.9 | 19.0 | 18.2 | 17.2 | 17.4 | 16.7 |
| <i>Acidobacteria</i>     | <i>Acidobacteria_Gp3</i>    | 0.0    | 0.0  | 0.0  | 0.0  | 0.2  | 0.5  | 0.8  | 0.6  | 0.8  | 0.0          | 0.0  | 0.0  | 0.1  | 0.1  | 0.6  | 0.8  | 0.0    | 0.0  | 0.0  | 0.1  | 0.4  | 1.9  | 2.3  | 2.1  | 1.3  |
| <i>Actinobacteria</i>    | <i>Actinobacteria</i>       | 0.3    | 0.6  | 2.3  | 4.9  | 7.2  | 6.2  | 7.7  | 7.1  | 13.1 | 0.1          | 0.4  | 1.0  | 2.1  | 1.2  | 4.0  | 9.0  | 0.1    | 0.6  | 0.7  | 2.5  | 6.0  | 20.5 | 28.3 | 25.5 | 31.1 |
| <i>Armatimonadetes</i>   | <i>Armatimonadia</i>        | 0.7    | 2.1  | 0.6  | 1.3  | 2.0  | 1.6  | 1.4  | 1.1  | 1.4  | 0.1          | 0.6  | 0.6  | 0.6  | 1.1  | 0.7  | 1.0  | 2.9    | 2.7  | 5.0  | 3.2  | 1.9  | 3.5  | 3.2  | 3.9  | 5.5  |
| <i>Bacteroidetes</i>     | <i>Sphingobacteriia</i>     | 0.3    | 0.1  | 0.0  | 0.0  | 0.1  | 0.1  | 0.1  | 0.2  | 0.3  | 0.0          | 0.0  | 0.0  | 0.1  | 0.0  | 0.0  | 0.2  | 0.0    | 0.2  | 0.2  | 0.2  | 0.5  | 1.1  | 0.8  | 0.9  | 0.9  |
| <i>Firmicutes</i>        | <i>Clostridia</i>           | 0.0    | 0.0  | 0.2  | 0.1  | 0.0  | 0.4  | 0.1  | 0.1  | 0.3  | 0.0          | 0.1  | 0.0  | 0.2  | 0.0  | 0.0  | 0.0  | 0.0    | 0.0  | 0.0  | 0.1  | 0.0  | 0.2  | 1.4  | 0.4  | 0.5  |
| <i>Planctomycetes</i>    | <i>Planctomycetia</i>       | 0.2    | 0.7  | 1.0  | 1.9  | 3.6  | 6.6  | 7.1  | 7.6  | 5.3  | 0.2          | 0.4  | 1.4  | 2.7  | 3.8  | 3.1  | 4.7  | 0.2    | 0.3  | 1.5  | 3.2  | 4.3  | 5.1  | 5.3  | 3.2  | 6.0  |
| <i>Proteobacteria</i>    | <i>Alphaproteobacteria</i>  | 72.3   | 73.1 | 74.1 | 64.9 | 56.9 | 46.3 | 38.1 | 45.5 | 35.7 | 69.2         | 79.5 | 72.1 | 69.7 | 61.3 | 56.1 | 43.1 | 72.7   | 74.9 | 67.5 | 63.0 | 51.5 | 32.7 | 24.5 | 30.1 | 26.2 |
| <i>Proteobacteria</i>    | <i>Betaproteobacteria</i>   | 0.0    | 0.1  | 0.1  | 0.2  | 0.1  | 0.3  | 0.9  | 1.2  | 0.8  | 0.0          | 0.0  | 0.1  | 0.1  | 0.0  | 2.4  | 0.9  | 0.0    | 0.0  | 0.0  | 0.1  | 0.0  | 0.7  | 1.0  | 0.8  | 0.0  |
| <i>Proteobacteria</i>    | <i>Deltaproteobacteria</i>  | 0.1    | 0.0  | 0.1  | 0.2  | 0.2  | 0.4  | 0.1  | 0.2  | 0.3  | 0.0          | 0.0  | 0.1  | 0.2  | 0.5  | 0.2  | 0.2  | 0.2    | 0.0  | 0.0  | 0.5  | 0.5  | 0.3  | 0.5  | 0.2  | 0.0  |
| <i>Proteobacteria</i>    | <i>Gammaproteobacteria</i>  | 0.0    | 0.0  | 0.2  | 0.2  | 0.4  | 1.9  | 2.8  | 2.7  | 4.5  | 0.0          | 0.1  | 0.3  | 0.1  | 0.2  | 1.2  | 1.8  | 0.1    | 0.0  | 0.2  | 0.2  | 1.1  | 2.2  | 3.6  | 1.1  | 0.3  |
| <i>Verrucomicrobia</i>   | <i>Spartobacteria</i>       | 0.1    | 0.4  | 0.3  | 0.8  | 1.6  | 1.9  | 1.6  | 1.3  | 2.9  | 0.1          | 0.1  | 1.1  | 1.0  | 1.4  | 1.7  | 1.8  | 0.3    | 0.2  | 1.1  | 2.5  | 2.5  | 1.7  | 2.5  | 2.7  | 3.3  |
| Candidate division WPS-1 | WPS-1_genera_incertae_sedis | 0.0    | 0.2  | 0.3  | 0.4  | 0.8  | 1.4  | 1.5  | 0.5  | 0.6  | 0.0          | 0.3  | 0.3  | 0.3  | 0.5  | 0.6  | 0.7  | 0.1    | 0.3  | 0.2  | 1.1  | 1.9  | 1.8  | 1.9  | 2.3  | 1.6  |
| Candidate division WPS-2 | WPS-2_genera_incertae_sedis | 0.1    | 1.3  | 3.6  | 7.7  | 8.8  | 9.1  | 9.6  | 11.8 | 11.7 | 0.3          | 2.8  | 6.9  | 9.1  | 11.4 | 9.5  | 11.7 | 0.3    | 2.4  | 5.0  | 6.9  | 9.5  | 8.4  | 5.4  | 7.3  | 4.7  |
| Others                   |                             | 1.0    | 0.2  | 0.2  | 0.1  | 0.3  | 0.8  | 1.5  | 1.7  | 1.2  | 1.1          | 0.0  | 0.0  | 0.5  | 0.2  | 1.1  | 0.6  | 0.0    | 0.2  | 0.2  | 0.4  | 0.8  | 1.7  | 2.2  | 1.9  | 2.0  |

Relative abundance was shaded with gradual dense from red to white.

**Table S6. Relative abundance of families of Alphaproteobacteria along the thalli**

| Order                                     | Family                     | Center |      |      |      |      |      |      |      |      | Intermediate |      |      |      |      |      |      | Margin |      |      |      |      |      |     |      |      |
|-------------------------------------------|----------------------------|--------|------|------|------|------|------|------|------|------|--------------|------|------|------|------|------|------|--------|------|------|------|------|------|-----|------|------|
|                                           |                            | A      | B    | C    | D    | E    | F    | G    | H    | I    | A            | B    | C    | D    | E    | F    | G    | A      | B    | C    | D    | E    | F    | G   | H    | I    |
| <i>Rhodospirillales</i>                   | <i>Acetobacteraceae</i>    | 49.7   | 40.8 | 40.4 | 45.2 | 42.5 | 32.5 | 24.2 | 26.1 | 20.8 | 49.7         | 41.6 | 41.6 | 47.0 | 48.5 | 42.3 | 29.1 | 47.0   | 54.0 | 47.5 | 46.0 | 35.2 | 15.4 | 9.7 | 11.6 | 11.8 |
| <i>Rhodospirillales</i>                   | <i>Rhodospirillaceae</i>   | 0.1    | 0.1  | 0.0  | 0.1  | 0.0  | 0.0  | 0.0  | 0.0  | 0.1  | 0.0          | 0.0  | 0.0  | 0.0  | 0.0  | 0.0  | 0.0  | 0.0    | 0.0  | 0.0  | 0.0  | 0.0  | 0.0  | 0.0 | 0.0  | 0.0  |
| <i>Rhodospirillales</i>                   | Unclassified               | 0.0    | 0.0  | 0.0  | 0.0  | 0.0  | 0.1  | 0.0  | 0.0  | 0.0  | 0.0          | 0.0  | 0.0  | 0.0  | 0.0  | 0.0  | 0.0  | 0.0    | 0.0  | 0.0  | 0.0  | 0.0  | 0.0  | 0.0 | 0.0  | 0.0  |
| <i>Rhizobiales</i>                        | <i>Beijerinckiaceae</i>    | 0.0    | 0.2  | 0.1  | 0.3  | 1.1  | 1.2  | 1.0  | 0.7  | 1.4  | 0.3          | 0.1  | 0.1  | 0.1  | 0.4  | 0.9  | 0.5  | 0.3    | 0.3  | 0.6  | 0.5  | 1.0  | 1.0  | 0.6 | 1.4  | 1.8  |
| <i>Rhizobiales</i>                        | <i>Bradyrhizobiaceae</i>   | 0.0    | 0.0  | 0.0  | 0.0  | 0.0  | 0.0  | 0.0  | 0.0  | 0.3  | 0.0          | 0.0  | 0.0  | 0.0  | 0.0  | 0.0  | 0.0  | 0.0    | 0.0  | 0.0  | 0.0  | 0.0  | 0.2  | 0.3 | 0.4  | 0.1  |
| <i>Rhizobiales</i>                        | <i>Brucellaceae</i>        | 0.0    | 0.0  | 0.0  | 0.0  | 0.0  | 0.0  | 0.0  | 0.0  | 0.0  | 0.0          | 0.1  | 0.0  | 0.0  | 0.0  | 0.0  | 0.0  | 0.0    | 0.0  | 0.0  | 0.0  | 0.0  | 0.0  | 0.0 | 0.0  | 0.0  |
| <i>Rhizobiales</i>                        | <i>Methylobacteriaceae</i> | 0.0    | 0.0  | 0.0  | 0.0  | 0.0  | 0.0  | 0.0  | 0.0  | 0.0  | 0.0          | 0.0  | 0.0  | 0.0  | 0.0  | 0.0  | 0.0  | 0.0    | 0.2  | 0.0  | 0.0  | 0.0  | 0.0  | 0.0 | 0.0  | 0.0  |
| <i>Rhizobiales</i>                        | <i>Rhizobiaceae</i>        | 0.0    | 0.0  | 0.0  | 0.0  | 0.0  | 0.0  | 0.0  | 0.0  | 0.0  | 0.0          | 0.0  | 0.0  | 0.0  | 0.0  | 1.9  | 0.0  | 0.0    | 0.0  | 0.0  | 0.0  | 0.0  | 0.0  | 0.0 | 0.0  | 0.0  |
| <i>Rhizobiales</i>                        | <i>Roseiarcaceae</i>       | 0.0    | 0.0  | 0.0  | 0.0  | 0.0  | 0.0  | 0.0  | 0.0  | 0.1  | 0.0          | 0.0  | 0.0  | 0.0  | 0.0  | 0.0  | 0.0  | 0.0    | 0.0  | 0.0  | 0.0  | 0.0  | 0.1  | 0.0 | 0.1  | 0.0  |
| <i>Rhizobiales</i>                        | Unclassified               | 20.9   | 26.2 | 23.3 | 11.5 | 5.3  | 5.1  | 5.2  | 6.6  | 5.4  | 16.5         | 31.2 | 23.6 | 16.1 | 6.6  | 6.7  | 5.2  | 20.0   | 13.7 | 11.9 | 8.4  | 8.0  | 6.8  | 6.2 | 6.1  | 4.6  |
| <i>Caulobacterales</i>                    | <i>Caulobacteraceae</i>    | 1.5    | 5.8  | 10.2 | 7.6  | 7.4  | 6.4  | 7.3  | 11.2 | 6.9  | 2.7          | 6.3  | 6.5  | 4.0  | 5.0  | 3.5  | 7.4  | 5.4    | 6.7  | 6.9  | 7.2  | 6.0  | 7.3  | 5.9 | 7.8  | 4.5  |
| <i>Rickettsiales</i>                      | <i>Rickettsiaceae</i>      | 0.0    | 0.0  | 0.0  | 0.0  | 0.0  | 0.0  | 0.0  | 0.0  | 0.0  | 0.0          | 0.0  | 0.0  | 0.0  | 0.0  | 0.0  | 0.0  | 0.0    | 0.0  | 0.0  | 0.0  | 0.0  | 0.0  | 0.0 | 0.0  | 0.0  |
| <i>Rhodobacterales</i>                    | <i>Rhodobacteraceae</i>    | 0.0    | 0.0  | 0.0  | 0.0  | 0.3  | 0.0  | 0.0  | 0.1  | 0.1  | 0.0          | 0.0  | 0.0  | 2.4  | 0.0  | 0.2  | 0.0  | 0.0    | 0.0  | 0.0  | 0.0  | 0.0  | 0.0  | 0.0 | 0.0  | 0.0  |
| <i>Sphingomonadales</i>                   | <i>Erythrobacteraceae</i>  | 0.0    | 0.0  | 0.0  | 0.0  | 0.0  | 0.0  | 0.0  | 0.0  | 0.0  | 0.0          | 0.0  | 0.0  | 0.1  | 0.0  | 0.0  | 0.0  | 0.0    | 0.0  | 0.0  | 0.0  | 0.0  | 0.0  | 0.0 | 0.0  | 0.0  |
| <i>Sphingomonadales</i>                   | <i>Sphingomonadaceae</i>   | 0.1    | 0.1  | 0.1  | 0.2  | 0.2  | 0.5  | 0.2  | 0.2  | 0.0  | 0.0          | 0.1  | 0.3  | 0.1  | 0.6  | 0.2  | 0.7  | 0.0    | 0.2  | 0.0  | 0.4  | 1.1  | 1.5  | 0.4 | 0.8  | 1.6  |
| <i>Alphaproteobacteria_incertae_sedis</i> | <i>Rhizomicrobium</i>      | 0.0    | 0.0  | 0.0  | 0.0  | 0.0  | 0.0  | 0.0  | 0.0  | 0.3  | 0.0          | 0.0  | 0.0  | 0.0  | 0.0  | 0.0  | 0.0  | 0.0    | 0.0  | 0.0  | 0.0  | 0.0  | 0.0  | 0.1 | 0.0  | 0.1  |
| <i>Alphaproteobacteria_unclassified</i>   | Unclassified               | 0.2    | 0.1  | 0.1  | 0.1  | 0.0  | 0.5  | 0.2  | 0.7  | 0.4  | 0.0          | 0.0  | 0.1  | 0.0  | 0.2  | 0.4  | 0.1  | 0.1    | 0.0  | 0.7  | 0.4  | 0.3  | 0.4  | 1.2 | 1.9  | 1.9  |

Relative abundance was shaded with gradual dense from red to white.

**Table S7. Relative abundance of major bacterial OTUs along the thalli**

| Class                      | Order                      | OTU_ID  | Center |      |      |      |     |      |      |     |     | Intermediate |      |      |      |      |      |      | Margin |      |      |      |     |     |      |      |      |
|----------------------------|----------------------------|---------|--------|------|------|------|-----|------|------|-----|-----|--------------|------|------|------|------|------|------|--------|------|------|------|-----|-----|------|------|------|
|                            |                            |         | A      | B    | C    | D    | E   | F    | G    | H   | I   | A            | B    | C    | D    | E    | F    | G    | A      | B    | C    | D    | E   | F   | G    | H    | I    |
| <i>Alphaproteobacteria</i> | <i>Rhodospirillales</i>    | BacCL5  | 10.2   | 11.6 | 10.1 | 11.4 | 9.7 | 5.4  | 3.1  | 0.6 | 1.2 | 10.1         | 8.1  | 11.2 | 14.8 | 14.8 | 12.7 | 5.9  | 9.9    | 13.3 | 14.8 | 16.3 | 7.6 | 0.7 | 0.4  | 0.6  | 0.2  |
| <i>Alphaproteobacteria</i> | <i>Rhodospirillales</i>    | BacCL8  | 2.0    | 4.1  | 4.7  | 5.0  | 4.8 | 3.8  | 2.7  | 3.1 | 0.4 | 6.1          | 8.8  | 6.1  | 6.4  | 8.6  | 6.2  | 4.6  | 6.8    | 8.1  | 4.9  | 5.8  | 4.0 | 1.2 | 0.4  | 0.3  | 0.4  |
| <i>Alphaproteobacteria</i> | <i>Rhodospirillales</i>    | BacCL9  | 19.6   | 8.3  | 5.7  | 6.0  | 3.9 | 2.1  | 0.7  | 0.2 | 0.0 | 14.2         | 7.2  | 6.0  | 8.2  | 4.3  | 2.9  | 0.9  | 8.2    | 6.5  | 4.5  | 3.9  | 2.3 | 0.4 | 0.1  | 0.0  | 0.1  |
| <i>Alphaproteobacteria</i> | <i>Rhodospirillales</i>    | BacCL10 | 0.7    | 1.7  | 4.4  | 5.2  | 3.9 | 4.2  | 3.1  | 3.9 | 1.4 | 2.0          | 5.5  | 5.1  | 5.7  | 8.4  | 8.2  | 5.2  | 5.9    | 12.4 | 7.2  | 9.0  | 8.5 | 2.0 | 0.6  | 0.6  | 1.2  |
| <i>Alphaproteobacteria</i> | <i>Rhodospirillales</i>    | BacCL15 | 5.2    | 2.2  | 2.3  | 2.4  | 3.0 | 1.5  | 0.8  | 1.2 | 0.4 | 6.6          | 4.6  | 4.2  | 2.7  | 1.6  | 0.8  | 0.5  | 3.6    | 2.7  | 0.7  | 0.8  | 0.3 | 0.1 | 0.3  | 0.1  | 0.2  |
| <i>Alphaproteobacteria</i> | <i>Rhodospirillales</i>    | BacCL18 | 0.3    | 0.6  | 0.9  | 1.6  | 2.8 | 2.1  | 2.2  | 2.9 | 2.9 | 0.1          | 1.0  | 0.9  | 1.2  | 3.3  | 2.5  | 1.7  | 0.5    | 1.6  | 1.9  | 3.0  | 2.5 | 0.9 | 0.5  | 0.8  | 1.6  |
| <i>Alphaproteobacteria</i> | <i>Rhodospirillales</i>    | BacCL20 | 8.3    | 6.9  | 5.0  | 4.6  | 3.4 | 0.6  | 0.2  | 0.2 | 0.4 | 4.2          | 2.4  | 2.0  | 0.5  | 0.7  | 0.6  | 0.4  | 5.3    | 5.1  | 5.0  | 1.7  | 0.5 | 0.3 | 0.6  | 0.5  | 0.9  |
| <i>Alphaproteobacteria</i> | <i>Rhodospirillales</i>    | BacCL21 | 0.1    | 0.7  | 1.0  | 1.6  | 2.8 | 4.0  | 3.2  | 1.1 | 1.1 | 0.3          | 0.6  | 0.6  | 1.1  | 1.4  | 2.3  | 2.1  | 0.8    | 1.0  | 1.1  | 1.0  | 2.5 | 1.4 | 0.3  | 0.3  | 0.2  |
| <i>Alphaproteobacteria</i> | <i>Rhodospirillales</i>    | BacCL25 | 1.2    | 1.9  | 3.4  | 3.7  | 1.5 | 1.6  | 0.4  | 0.6 | 0.4 | 1.6          | 2.2  | 2.7  | 2.9  | 2.1  | 1.2  | 0.7  | 1.6    | 1.0  | 2.2  | 1.5  | 1.2 | 0.5 | 0.4  | 0.1  | 0.0  |
| <i>Alphaproteobacteria</i> | <i>Rhizobiales</i>         | BacCL6  | 20.7   | 26.1 | 22.7 | 11.0 | 3.4 | 0.8  | 0.6  | 0.4 | 0.0 | 16.5         | 30.6 | 22.7 | 15.4 | 4.0  | 1.1  | 0.1  | 19.7   | 13.2 | 11.1 | 5.5  | 0.8 | 0.1 | 0.0  | 0.1  | 0.0  |
| <i>Alphaproteobacteria</i> | <i>Rhizobiales</i>         | BacCL16 | 0.0    | 0.1  | 0.1  | 0.3  | 1.9 | 3.8  | 3.9  | 4.9 | 1.2 | 0.0          | 0.4  | 0.6  | 0.6  | 2.6  | 5.4  | 4.8  | 0.2    | 0.3  | 0.2  | 2.6  | 6.7 | 5.1 | 3.4  | 3.5  | 2.5  |
| <i>Alphaproteobacteria</i> | <i>Caulobacterales</i>     | BacCL7  | 1.5    | 5.7  | 10.2 | 7.1  | 6.6 | 3.5  | 1.9  | 4.8 | 3.9 | 2.7          | 6.1  | 6.4  | 3.8  | 4.2  | 2.1  | 2.4  | 5.4    | 6.3  | 6.5  | 6.3  | 3.3 | 2.2 | 1.3  | 0.9  | 1.5  |
| <i>Alphaproteobacteria</i> | <i>Caulobacterales</i>     | BacCL17 | 0.0    | 0.1  | 0.0  | 0.5  | 0.9 | 2.7  | 5.1  | 5.8 | 2.5 | 0.0          | 0.1  | 0.1  | 0.2  | 0.6  | 1.3  | 4.4  | 0.0    | 0.2  | 0.4  | 0.8  | 2.5 | 3.6 | 2.7  | 3.5  | 2.1  |
| <i>Acidobacteria_Gpl</i>   | <i>Granulicella</i>        | BacCL3  | 11.7   | 10.8 | 5.1  | 4.9  | 5.5 | 12.0 | 15.3 | 7.9 | 6.7 | 10.9         | 5.8  | 5.0  | 5.2  | 6.1  | 9.2  | 14.4 | 12.2   | 8.1  | 5.2  | 5.4  | 8.0 | 6.9 | 6.5  | 6.8  | 5.4  |
| <i>Acidobacteria_Gpl</i>   | <i>Granulicella</i>        | BacCL26 | 0.1    | 0.1  | 0.8  | 0.5  | 0.4 | 0.7  | 0.7  | 0.4 | 0.1 | 0.5          | 1.6  | 3.5  | 2.9  | 4.4  | 2.4  | 1.4  | 0.3    | 0.5  | 2.4  | 3.0  | 1.6 | 0.6 | 0.0  | 1.0  | 0.8  |
| <i>Acidobacteria_Gpl</i>   | unclassified               | BacCL13 | 6.2    | 6.0  | 5.6  | 6.8  | 4.4 | 1.4  | 1.5  | 0.7 | 0.1 | 2.4          | 3.3  | 3.2  | 1.8  | 1.7  | 1.4  | 0.8  | 5.2    | 4.6  | 4.3  | 2.3  | 0.8 | 0.4 | 0.2  | 0.7  | 0.9  |
| <i>Acidobacteria_Gpl</i>   | unclassified               | BacCL14 | 0.0    | 0.0  | 0.2  | 0.2  | 1.3 | 3.3  | 3.4  | 5.2 | 7.5 | 0.1          | 0.0  | 0.1  | 0.2  | 0.5  | 1.1  | 1.4  | 0.0    | 0.2  | 0.6  | 0.4  | 1.2 | 3.2 | 4.3  | 3.8  | 3.7  |
| <i>Acidobacteria_Gpl</i>   | unclassified               | BacCL19 | 0.0    | 0.4  | 2.5  | 2.6  | 3.4 | 3.4  | 2.5  | 1.1 | 0.9 | 0.0          | 0.1  | 1.4  | 1.8  | 3.4  | 2.8  | 3.3  | 0.7    | 1.4  | 3.7  | 2.9  | 3.2 | 1.9 | 0.4  | 0.7  | 0.7  |
| <i>Acidobacteria_Gpl</i>   | unclassified               | BacCL32 | 4.9    | 2.9  | 1.6  | 0.8  | 1.0 | 0.1  | 0.0  | 0.0 | 0.0 | 9.8          | 2.8  | 0.7  | 0.1  | 0.1  | 0.0  | 0.0  | 3.8    | 1.9  | 0.7  | 0.1  | 0.1 | 0.0 | 0.0  | 0.0  | 0.0  |
| <i>Actinobacteria</i>      | <i>Solirubrobacterales</i> | BacCL11 | 0.1    | 0.0  | 0.4  | 0.3  | 0.8 | 0.7  | 1.6  | 1.9 | 6.7 | 0.0          | 0.0  | 0.0  | 0.1  | 0.1  | 0.4  | 0.8  | 0.0    | 0.0  | 0.0  | 0.6  | 1.3 | 4.8 | 13.7 | 11.6 | 12.3 |
| <i>Actinobacteria</i>      | <i>Solirubrobacterales</i> | BacCL12 | 0.0    | 0.1  | 0.8  | 2.1  | 3.0 | 2.3  | 2.3  | 3.2 | 1.9 | 0.1          | 0.0  | 0.3  | 0.8  | 0.6  | 0.9  | 4.5  | 0.0    | 0.2  | 0.6  | 0.5  | 1.8 | 4.4 | 5.6  | 4.2  | 4.0  |
| WPS-2                      | WPS-2                      | BacCL4  | 0.1    | 1.3  | 3.6  | 7.6  | 8.4 | 8.6  | 8.4  | 9.9 | 7.8 | 0.3          | 2.8  | 6.9  | 9.0  | 11.3 | 9.0  | 10.3 | 0.3    | 2.4  | 4.6  | 6.6  | 8.7 | 6.6 | 4.0  | 6.1  | 3.5  |
| <i>Spartobacteria</i>      | incertae sedis             | BacCL28 | 0.0    | 0.0  | 0.1  | 0.6  | 1.1 | 1.3  | 1.2  | 1.0 | 2.4 | 0.0          | 0.1  | 0.5  | 0.8  | 1.2  | 1.2  | 1.3  | 0.1    | 0.0  | 0.2  | 1.5  | 1.3 | 1.1 | 1.6  | 1.5  | 2.0  |

Major OTUs were selected over the 1% in total bacterial sequence reads. Relative abundance was shaded with gradual dense from red to white.

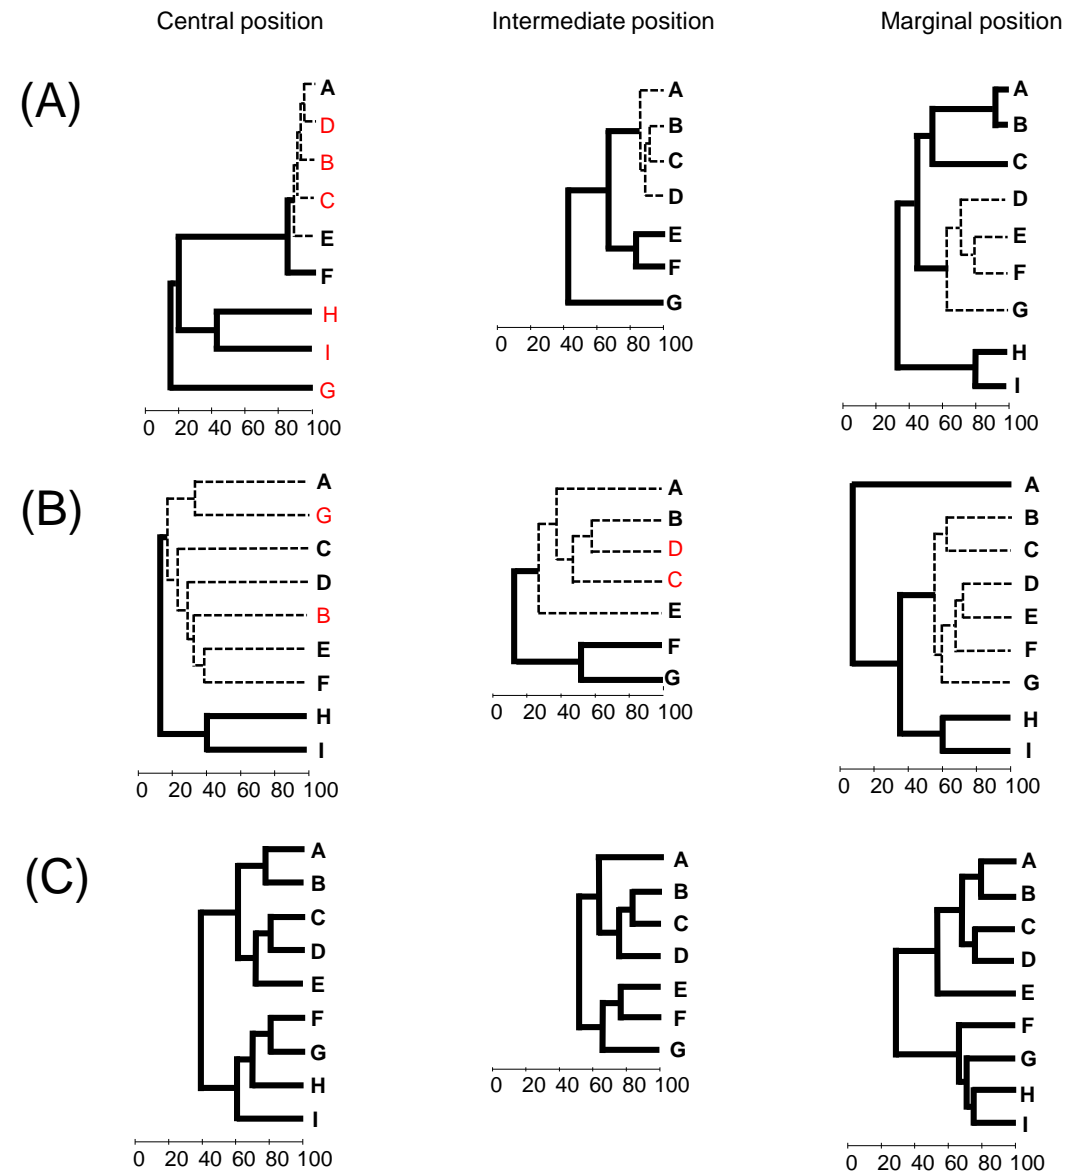

**Figure S1. The group averaging cluster analysis of algal (A), lichen-associated fungal (B), and bacterial (C) communities based on Bray-Curtis similarity of OTU abundance.** The thick lines indicate significantly supported clusters by the SIMPROF test ( $P < 0.05$ ). Subsamples are labelled from apical to basal parts (A to I) as illustrated in Figure 1B. Black and bold characters denote subsamples that maintain the original order and red characters denote the others.



**Table S8. Pair-wise comparisons according to the vertical positions at OTU level**

| Category                | Groups             | t   | <i>P-value</i> | Permutations |
|-------------------------|--------------------|-----|----------------|--------------|
| Algae                   | apical-middle part | 2   | 0.0009         | 9927         |
| Algae                   | apical-basal part  | 3.6 | 0.0001         | 9914         |
| Algae                   | middle-basal part  | 1.9 | 0.0458         | 9928         |
| Lichen-associated fungi | apical-middle part | 1.8 | 0.0028         | 9929         |
| Lichen-associated fungi | apical-basal part  | 3.2 | 0.0001         | 9930         |
| Lichen-associated fungi | middle-basal part  | 1.7 | 0.0011         | 9922         |
| Bacteria                | apical-middle part | 2.7 | 0.0003         | 9936         |
| Bacteria                | apical-basal part  | 4.4 | 0.0001         | 9912         |
| Bacteria                | middle-basal part  | 2.5 | 0.0003         | 9908         |

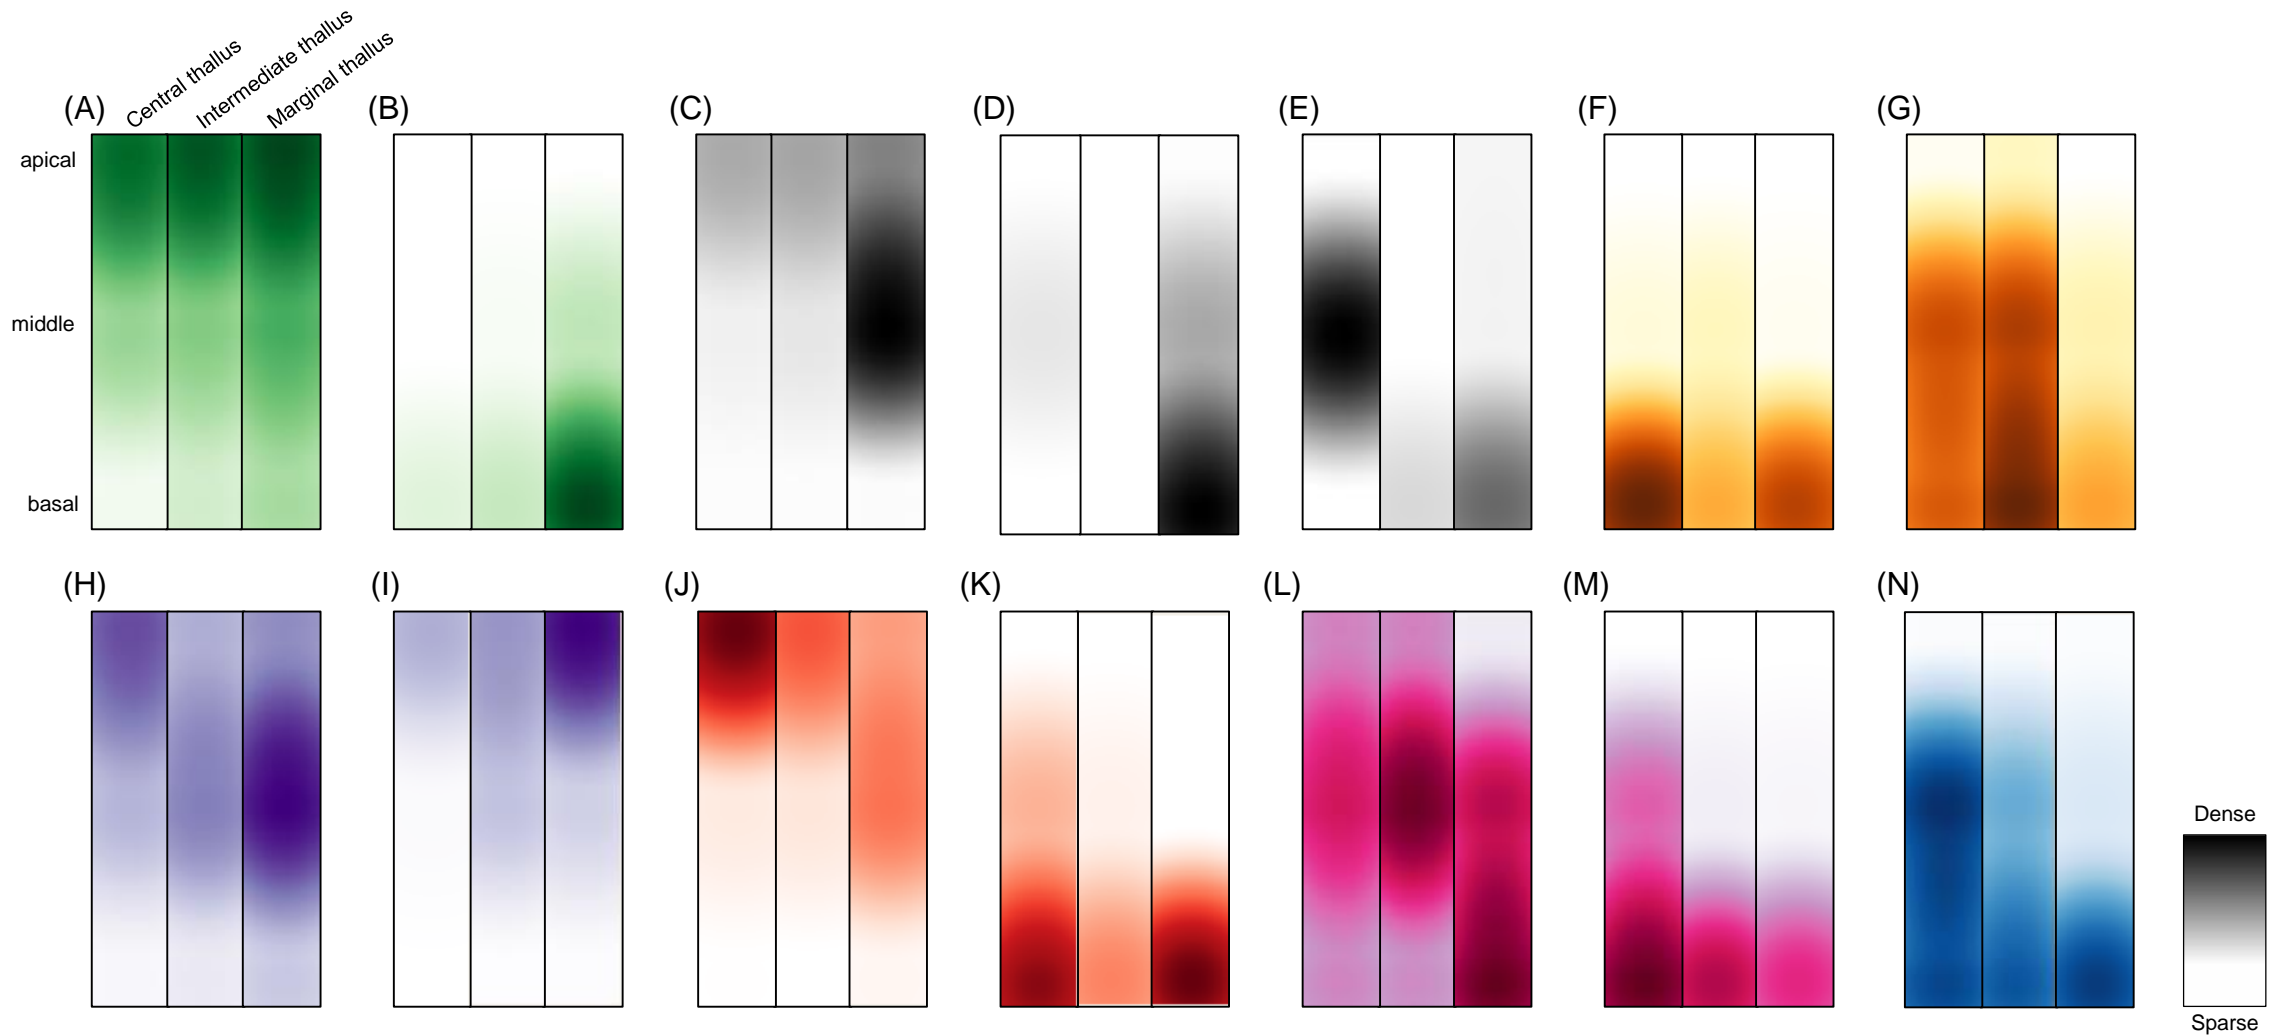

**Figure S2. The spatial distribution diagrams of major eukaryotic and bacterial OTUs in *Cladonia squamosa* colony.** (A) EukCL3 (*Asterochloris erici*, maximum relative abundance at Ma=0.037); (B) EukCL14 (Trebouxiophyceae, Mb=0.011); (C) EukCL4 (Arthoniomycetes, Mm=0.026); (D) EukCL7 (*Lepraria* species of *Lecanoromycetes*, Mb=0.036); (E) EukCL10 (*Ochrolechia frigida* of *Lecanoromycetes*, Cm=0.003); (F) BacCL11 (*Actinobacteria*, Cb=0.033); (G) BacCL12 (*Actinobacteria*, Ib=0.045); (H) BacCL5 (*Rhodospirillales*, Mm=0.164); (I) BacCL9 (*Rhodospirillales*, Ma=0.364); (J) BacCL6 (*Rhizobiales*, Ca=0.190); (K) BacCL16 (LAR1 of *Rhizobiales*, Mb=0.014); (L) BacCL7 (*Caulobacterales*, Mb=0.077); (M) BacCL17 (*Caulobacterales*, Cb=0.021); (N) BacCL4 (WPS-2, Cm=0.094).
